# Supplementary material for: Immune-Related lncRNAs to Construct Novel Signatures and Predict the Prognosis of Rectal Cancer
Source: PubMed Central journal article supplement (PMC8415501; doi:10.3389/fonc.2021.661846), 2021-08-16
Supplement: DataSheet_1.pdf [file DataSheet_1.pdf]

## Immune-Related lncRNAs to Construct Novel Signature and Predict the Prognosis of Rectal Cancer

Xiao-Liang Xing<sup>1,2</sup>, Chaoqun Xing<sup>1,2</sup>, Zhi Huang<sup>1,2</sup>, Zhi-Yong Yao<sup>1,2\*</sup>, Yuan-Wu Liu<sup>3\*</sup>

<sup>1</sup>School of public health and laboratory medicine, Hunan University of Medicine, Huaihua 418000, Hunan, P. R. China.

<sup>2</sup>Xiangya Hospital, Central South University, Changsha, 410078, Hunan, P. R. China.

<sup>3</sup>Beijing Advanced Innovation Center for Food Nutrition and Human Health, China Agricultural University, 100193, Beijing, China.

\*Correspondence: Zhi-Yong Yao, 179129382@qq.com. Yuan-Wu Liu, yuanwu\_liu@126.com.

**Supplementary table 1** The significantly difference immune cells and immune factors between control and cancer

| Type          | Immune cells and factors       | Control (n=10) |      | READ (n=166) |      |
|---------------|--------------------------------|----------------|------|--------------|------|
|               |                                | Mean           | SD   | Mean         | SD   |
| CIBERSORT     | Mast cell activated            | 0.07           | 0.05 | 0.01         | 0.02 |
|               | B cell plasma                  | 0.14           | 0.06 | 0.05         | 0.05 |
|               | Macrophage M0                  | 0.00           | 0.00 | 0.14         | 0.10 |
|               | B cell naive                   | 0.06           | 0.05 | 0.02         | 0.03 |
|               | Macrophage M1                  | 0.01           | 0.01 | 0.05         | 0.04 |
|               | Monocyte                       | 0.03           | 0.03 | 0.01         | 0.02 |
|               | Myeloid dendritic cell resting | 0.01           | 0.01 | 0.01         | 0.01 |
|               | NK cell resting                | 0.00           | 0.00 | 0.02         | 0.03 |
| CIBERSORT-ABS | Macrophage M2                  | 0.27           | 0.10 | 0.21         | 0.09 |
|               | Mast cell activated            | 0.04           | 0.03 | 0.00         | 0.01 |
|               | B cell plasma                  | 0.09           | 0.05 | 0.02         | 0.02 |
|               | B cell naive                   | 0.05           | 0.06 | 0.01         | 0.01 |
|               | T cell CD4+ memory resting     | 0.13           | 0.05 | 0.06         | 0.04 |
|               | Monocyte                       | 0.02           | 0.03 | 0.01         | 0.01 |
|               | Myeloid dendritic cell resting | 0.01           | 0.01 | 0.00         | 0.00 |
|               | Macrophage M2                  | 0.17           | 0.05 | 0.08         | 0.07 |
|               | Macrophage M0                  | 0.00           | 0.00 | 0.05         | 0.05 |
|               | NK cell activated              | 0.02           | 0.02 | 0.01         | 0.01 |
| EPIC          | B cell memory                  | 0.01           | 0.02 | 0.00         | 0.01 |
|               | NK cell resting                | 0.00           | 0.00 | 0.01         | 0.01 |
|               | B cell                         | 0.02           | 0.03 | 0.00         | 0.01 |
|               | T cell CD4+                    | 0.05           | 0.02 | 0.03         | 0.01 |
|               | T cell CD8+                    | 0.02           | 0.01 | 0.01         | 0.01 |
|               | Endothelial cell               | 0.03           | 0.01 | 0.02         | 0.01 |

|            |                                  |        |        |        |        |
|------------|----------------------------------|--------|--------|--------|--------|
|            | Macrophage                       | 0.01   | 0.00   | 0.01   | 0.01   |
| MCPCOUNTER | Neutrophil                       | 31.45  | 16.61  | 7.03   | 4.99   |
|            | Myeloid dendritic cell           | 6.28   | 2.84   | 1.30   | 1.16   |
|            | B cell                           | 14.77  | 16.54  | 2.01   | 3.33   |
|            | Cancer associated fibroblast     | 743.13 | 508.12 | 297.41 | 317.95 |
|            | Endothelial cell                 | 9.56   | 3.18   | 6.07   | 3.39   |
|            | T cell                           | 4.99   | 1.80   | 3.65   | 1.74   |
|            | cytotoxicity score               | 3.16   | 0.96   | 1.88   | 1.71   |
|            | Monocyte                         | 10.43  | 3.45   | 6.78   | 4.96   |
|            | Macrophage/Monocyte              | 10.43  | 3.45   | 6.78   | 4.96   |
| QUANTISEQ  | uncharacterized cell             | 0.64   | 0.06   | 0.82   | 0.05   |
|            | T cell CD4+ (non-regulatory)     | 0.07   | 0.03   | 0.02   | 0.02   |
|            | B cell                           | 0.03   | 0.03   | 0.00   | 0.01   |
|            | Neutrophil                       | 0.11   | 0.04   | 0.06   | 0.02   |
|            | Macrophage M1                    | 0.08   | 0.02   | 0.05   | 0.02   |
|            | Macrophage M2                    | 0.03   | 0.01   | 0.02   | 0.01   |
|            | T cell regulatory (Tregs)        | 0.02   | 0.01   | 0.01   | 0.01   |
| TIMER      | T cell CD8+                      | 0.27   | 0.02   | 0.17   | 0.04   |
|            | Myeloid dendritic cell           | 0.65   | 0.09   | 0.50   | 0.09   |
|            | B cell                           | 0.17   | 0.08   | 0.10   | 0.04   |
|            | Macrophage                       | 0.09   | 0.04   | 0.04   | 0.03   |
| XCELL      | B cell memory                    | 0.08   | 0.08   | 0.00   | 0.01   |
|            | Class-switched memory B cell     | 0.05   | 0.03   | 0.01   | 0.01   |
|            | Cancer associated fibroblast     | 0.16   | 0.11   | 0.02   | 0.04   |
|            | B cell                           | 0.15   | 0.17   | 0.02   | 0.03   |
|            | microenvironment score           | 0.25   | 0.13   | 0.06   | 0.07   |
|            | stroma score                     | 0.09   | 0.06   | 0.02   | 0.03   |
|            | immune score                     | 0.16   | 0.12   | 0.04   | 0.05   |
|            | B cell naive                     | 0.02   | 0.04   | 0.00   | 0.00   |
|            | Hematopoietic stem cell          | 0.17   | 0.07   | 0.07   | 0.05   |
|            | T cell CD4+ Th1                  | 0.01   | 0.02   | 0.07   | 0.04   |
|            | B cell plasma                    | 0.02   | 0.01   | 0.01   | 0.01   |
|            | Macrophage M1                    | 0.02   | 0.01   | 0.01   | 0.01   |
|            | Myeloid dendritic cell activated | 0.26   | 0.06   | 0.14   | 0.10   |
|            | Plasmacytoid dendritic cell      | 0.03   | 0.02   | 0.01   | 0.02   |
|            | Myeloid dendritic cell           | 0.02   | 0.01   | 0.01   | 0.01   |
|            | T cell CD8+ central memory       | 0.02   | 0.02   | 0.01   | 0.01   |
|            | Granulocyte-monocyte progenitor  | 0.01   | 0.02   | 0.00   | 0.01   |
|            | T cell CD4+ memory               | 0.04   | 0.02   | 0.03   | 0.02   |
|            | Macrophage                       | 0.02   | 0.01   | 0.01   | 0.02   |
